# Supplementary material
Source: PubMed Central journal article supplement (PMC5752265)
Supplement: jciinsight-2-93764-s001.pdf [file jciinsight-2-93764-s001.pdf]

**Supplemental Figure 1, Edwards et al.**

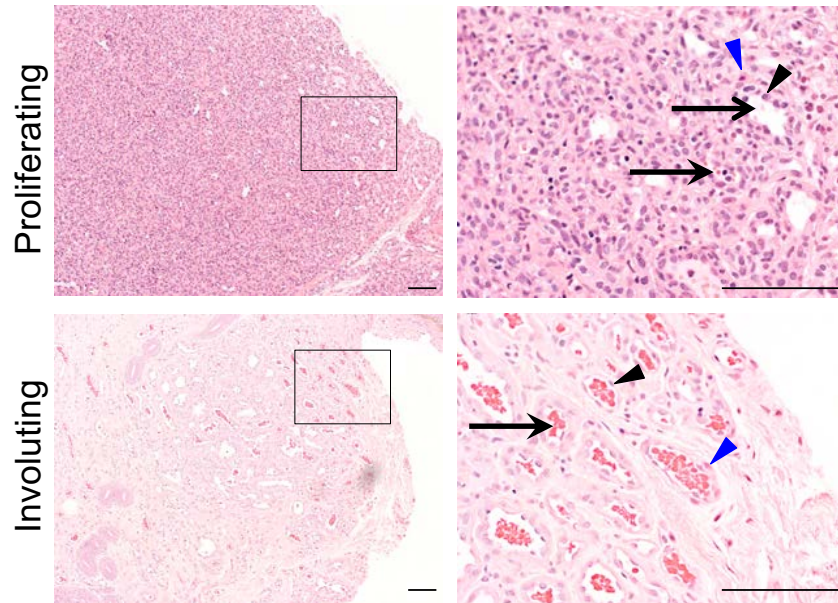

**Supplemental Figure 1. Proliferating and involuting IH morphology.** Representative H&E staining of proliferating (n=3) and involuting IHs (n=3). Boxed area enlarged to right. Black arrowheads mark endothelial cells. Blue arrowheads mark perivascular cells. Black arrows mark red blood cells. Scale bars - 100 $\mu$ m. IH, infantile hemangioma.

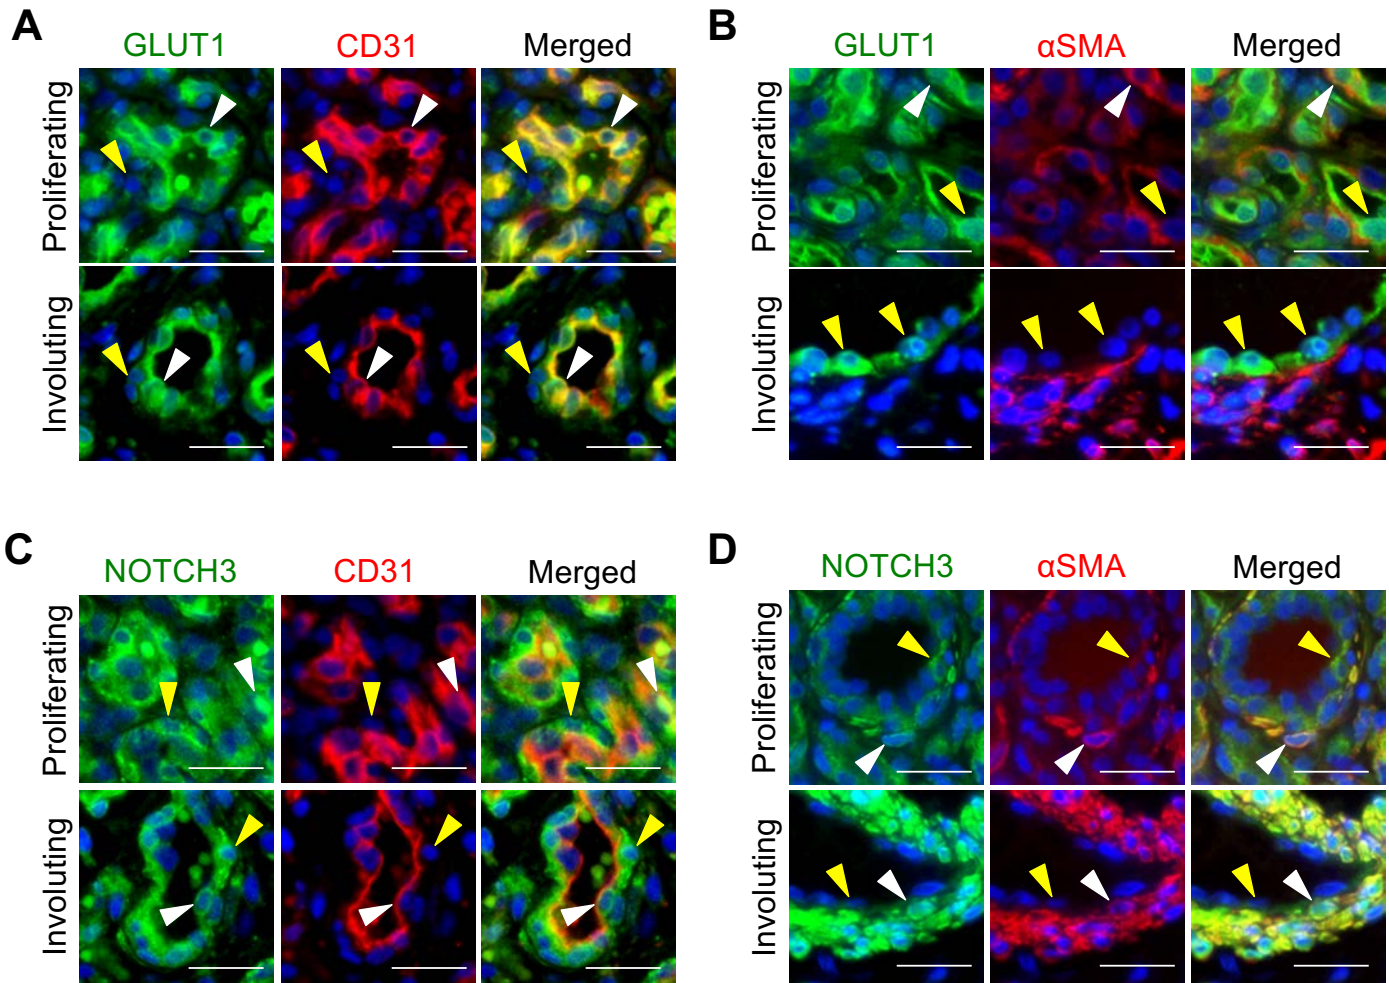

**Supplemental Figure 2. High magnification images of proliferating and involuting IHs presented in Figure 1.** **A)** GLUT1 and CD31 co-staining. White arrowheads mark GLUT1+/CD31+ cells. Yellow arrowheads mark GLUT1+/CD31- cells. 3, Proliferating IH n=2, involuting IH n=3. **B)** GLUT1 and  $\alpha$ SMA co-staining. Yellow arrowheads mark  $\alpha$ SMA+/GLUT1- perivascular cells. Proliferating IH n=2, involuting IH n=7 **C)** NOTCH3 and CD31 co-staining. White arrowheads mark NOTCH3+/CD31+ cells. Yellow arrowheads mark NOTCH3+/CD31- cells. Proliferating IH n=4, involuting IH n=5. **D)** NOTCH3 and  $\alpha$ SMA co-staining. White arrowheads mark NOTCH3+/ $\alpha$ SMA+ perivascular cells. Yellow arrowheads mark NOTCH3+/ $\alpha$ SMA- luminal cells. Proliferating IH n=5, involuting IH n=8. Scale bars - 25 $\mu$ m. Total number of IH specimens assessed for each antigen presented in Supplemental Table 3.  $\alpha$ SMA, alpha smooth muscle actin; GLUT1, glucose transporter 1; IH, infantile hemangioma.

Supplemental Figure 3, Edwards et al.

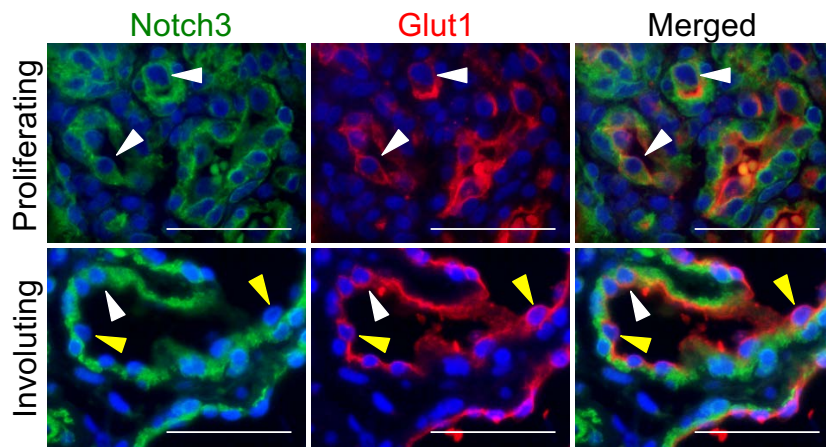

**Supplemental Figure 3. NOTCH3 is expressed in a subset of Glut1+ IH cells.** Proliferating and involuting IH specimens stained for NOTCH3 and GLUT1. White arrowheads mark NOTCH3+/GLUT1+ cells. Yellow arrowheads mark GLUT1+/NOTCH3- lumenal cells. Proliferating IH n=4, involuting IH n=2 Scale bars - 50 $\mu$ m. GLUT1, glucose transporter 1; IH, infantile hemangioma.

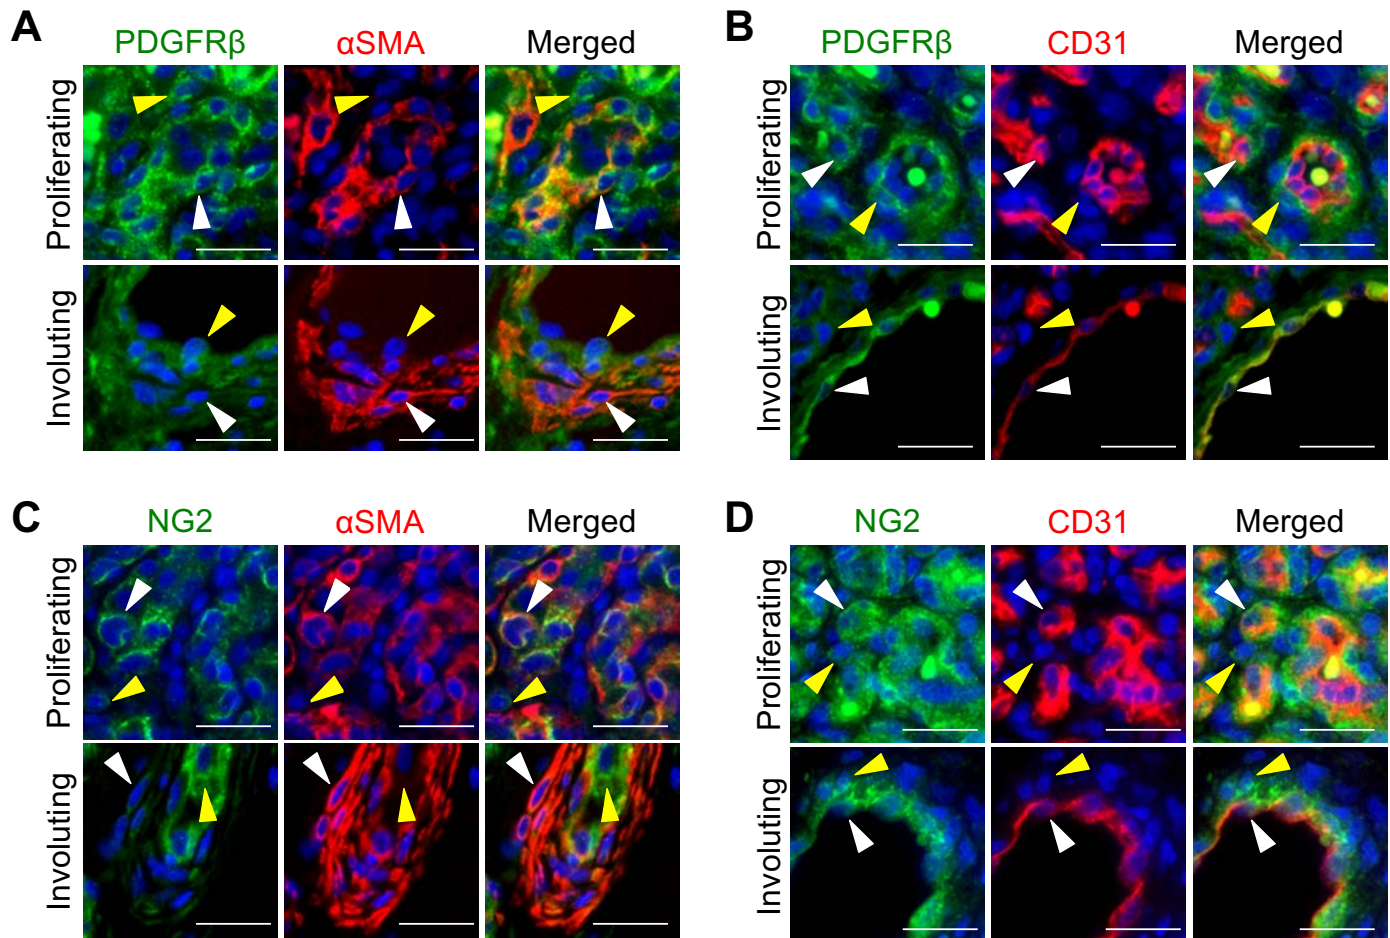

**Supplemental Figure 4. High magnification images of proliferating and involuting IHs presented in Figure 2.** **A)** PDGFR $\beta$  and  $\alpha$ SMA co-staining. White arrowheads mark PDGFR $\beta$ +/ $\alpha$ SMA+ perivascular cells. Yellow arrowheads mark PDGFR $\beta$ +/ $\alpha$ SMA- cells. Proliferating IH n=2, involuting IH n=3. **B)** PDGFR $\beta$  and CD31 co-staining. White arrowheads mark PDGFR $\beta$ +/ $\alpha$ SMA+ cells. Yellow arrowheads mark PDGFR $\beta$ +/ $\alpha$ SMA- perivascular cells. Proliferating IH n=3, involuting IH n=2. **C)** NG2 and  $\alpha$ SMA co-staining. White arrowheads mark NG2+/ $\alpha$ SMA+ cells, and yellow arrowheads mark NG2+/ $\alpha$ SMA- cells. Proliferating IH n=7, involuting IH n=7. **D)** NG2 and CD31 co-staining. White arrowheads mark NG2+/ $\alpha$ SMA+ cells, and yellow arrowheads mark NG2+/ $\alpha$ SMA- cells. Proliferating IH n=7, involuting IH n=3. Scale bars - 25 $\mu$ m. Total number of IH specimens assessed for each antigen presented in Supplemental Table 3.  $\alpha$ SMA, alpha smooth muscle actin; GLUT1, glucose transporter 1; IH, infantile hemangioma; NG2, neuron-gial antigen 2.

**A**

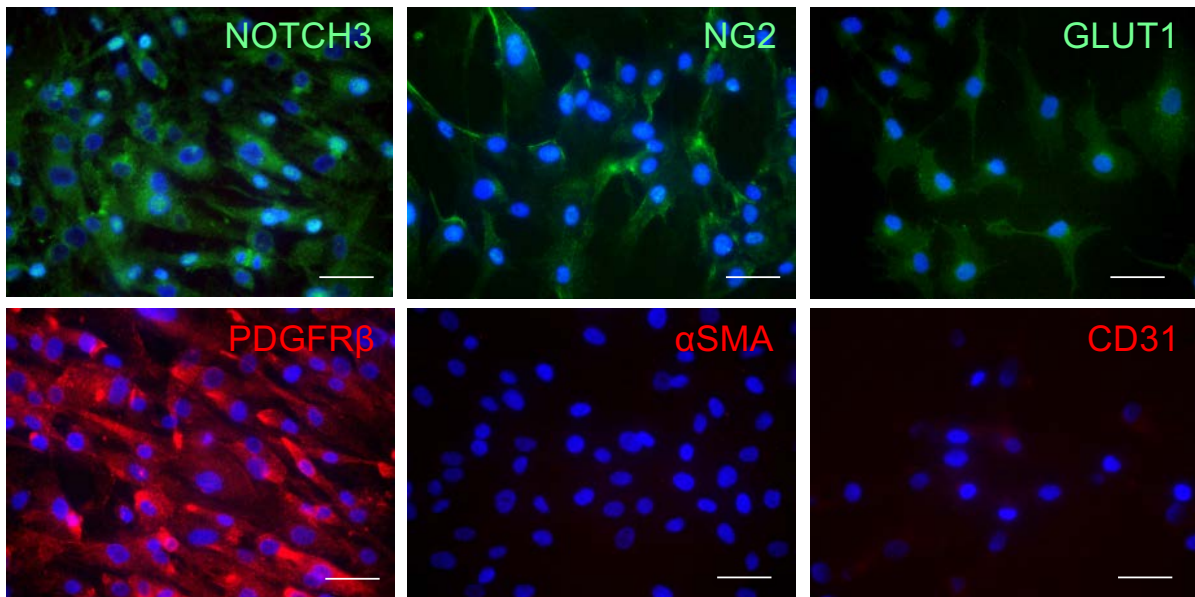

**B**

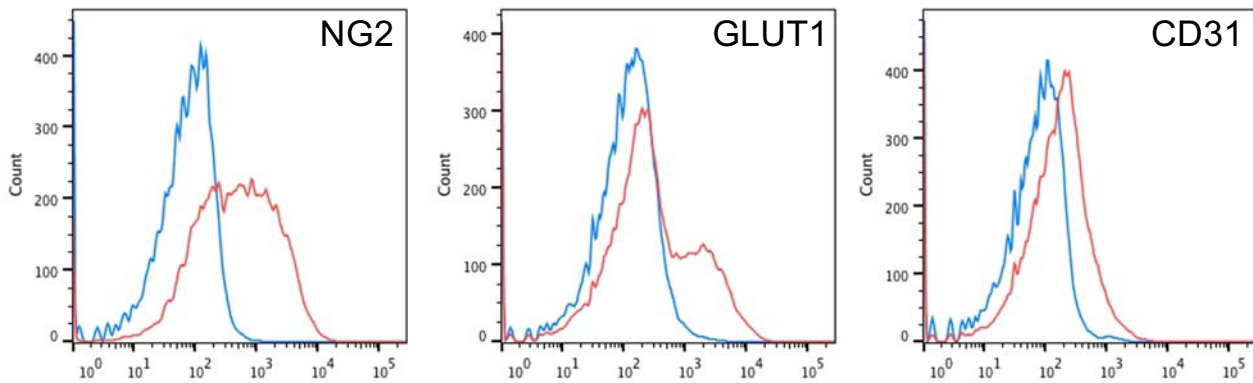

**C**

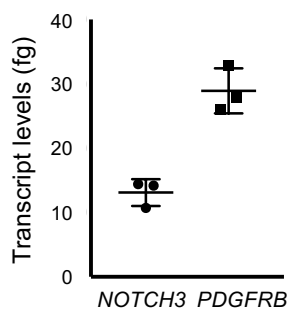

**Supplemental Figure 5. Expression of endothelial and perivascular markers in isolated HemSCs.** **A** CD133+ HemSCs (n=3, done in duplicate) stained for NOTCH3, NG2, GLUT1, PDGFR $\beta$ ,  $\alpha$ SMA, and CD31. Scale bars - 50 $\mu$ m. **B** NG2, GLUT1 and CD31 (red line) and control IgG (blue line) FACS of HemSCs (n=3, done in duplicate). **C** Representative data of HemSC *NOTCH3* and *PDGFRB* transcript levels determined by qRT-PCR and normalized to *BACTIN*. (n=3, done in duplicate) Error bars represent  $\pm$  S.D.  $\alpha$ SMA, alpha smooth muscle actin; GLUT1, glucose transporter 1; IH, infantile hemangioma; HemSC, hemangioma stem cell; NG2, neuron-gial antigen 2.

## Supplemental Figure 6, Edwards et al.

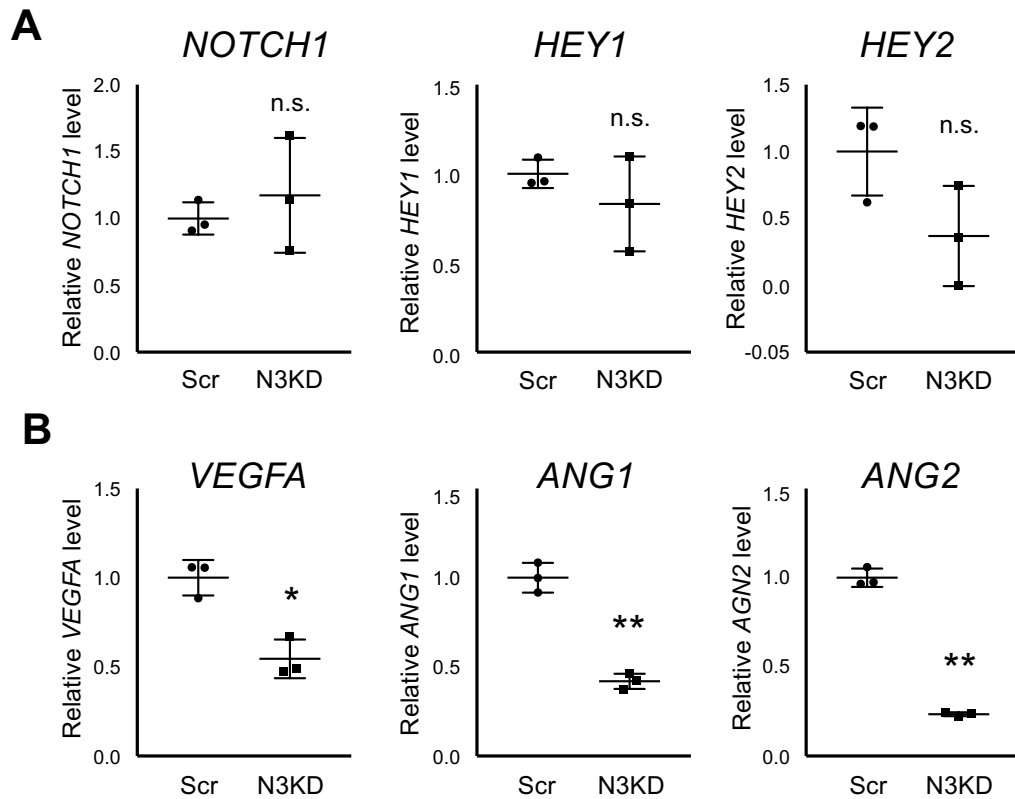

**Supplemental Figure 6. Characterization of *NOTCH3* knockdown HemSCs.** **A)** Relative *NOTCH1*, *HEY1* and *HEY2* transcript levels. Representative data from 4 independent N3KD HemSC populations and matching Scr HemSC populations determined by qRT-PCR and normalized to *BACTIN*. Error bars represent  $\pm$  S.D. n.s. - not significant. Student T-Test. **B)** Relative *VEGFA*, *ANG1*, and *ANG2* transcript levels. Representative data from 2 independent N3KD HemSC populations and matching Scr HemSC populations determined by qRT-PCR and normalized to *BACTIN*. Error bars represent  $\pm$  S.D. \* $p < 0.01$ , \*\* $p < 0.005$ . Student T-Test. ANG1, angiotensin 1; ANG2, angiotensin 2; HemSC, hemangioma stem cell; N3KD, Notch3 knockdown,

## Supplemental Figure 7, Edwards et al.

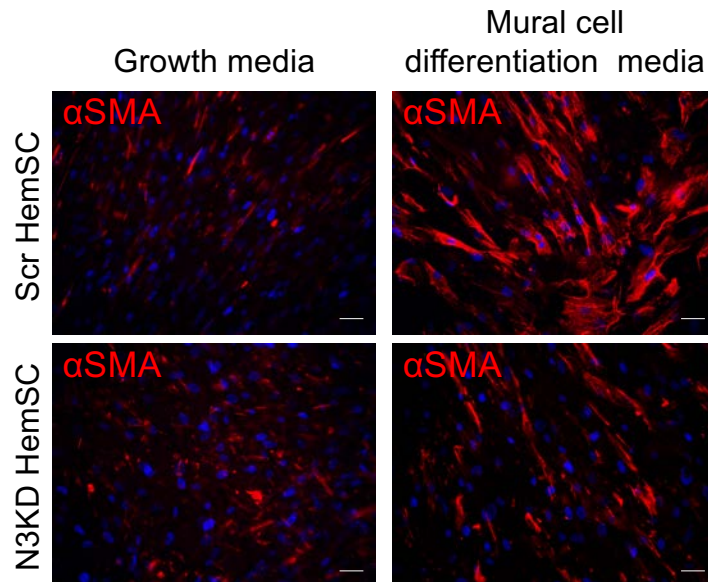

**Supplemental Figure 7. *NOTCH3* knockdown blocks HemSC mural cell differentiation.** Scrambled HemSCs (Scr HemSC) or *NOTCH3* knockdown HemSCs (N3KD HemSC) were grown in growth or mural cell differentiation media for 2 weeks and stained for  $\alpha$ SMA. Scale bars - 50 $\mu$ m. (n=3 HemSC populations done in duplicate)  $\alpha$ SMA, alpha smooth muscle actin; HemSC, hemangioma stem cell.

## Supplemental Figure 8, Edwards et al.

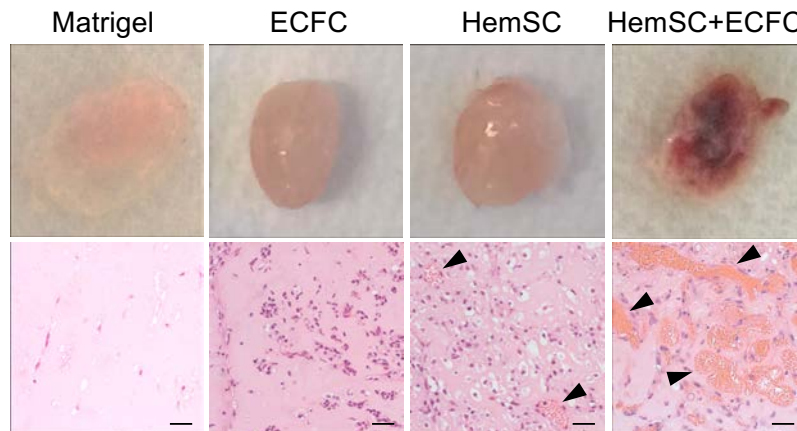

**Supplemental Figure 8. HemSC/ECFC xenografts robustly develop an IH like phenotype.** HemSCs, ECFCs or both ECFCs and HemSCs in 1:1 ratio were resuspended in Matrigel, and subcutaneously implanted into the flanks of immunocompromised mice. Matrigel without cells served as a control. Xenografts were evaluated at Day 14 post-implantation. Two independent experiments were done and representative data presented. **Top)** Gross appearance of explanted Matrigel. **Bottom)** H&E staining of representative xenograft sections. Arrowheads mark large caliber red-blood cell containing IH-like vessel. Scale bar - 50 $\mu$ m. IH, infantile hemangioma; HemSCs, hemangioma stem cells; ECFCs, endothelial colony forming cells.



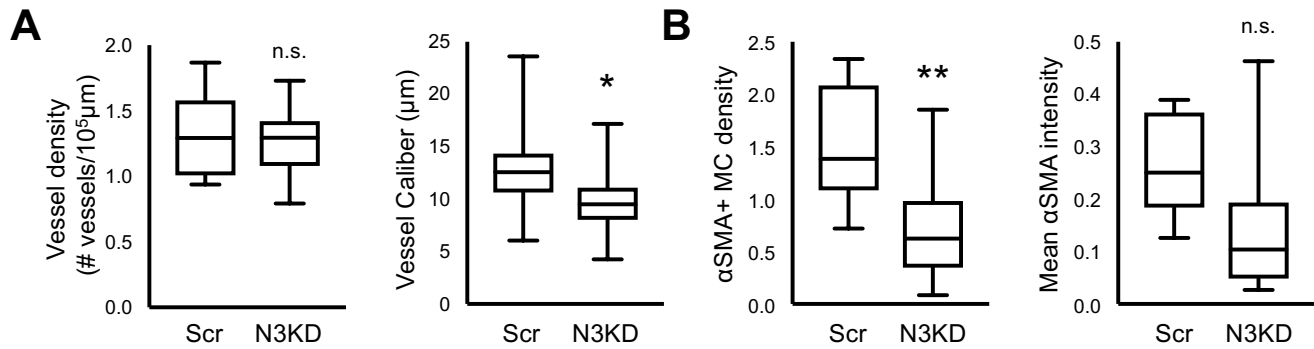

**Supplemental Figure 9. *NOTCH3* knockdown in HemSCs inhibits IH development in a HemSC-only xenograft mouse model.** **A)** Quantification of vessel density and caliber. Results representative of  $n = 3$  HemSC populations (2 implants each). Error bars represent  $\pm$  S.D. n.s., not significant,  $*p < 0.0001$ . Student T-Test. **B)**  $\alpha$ SMA+ mural cell density determined as mean mural cell  $\alpha$ SMA signal intensity normalized to IH endothelial GLUT1 signal intensity. Average mural cell  $\alpha$ SMA expression determined as mean  $\alpha$ SMA signal intensity normalized DAPI+/ $\alpha$ SMA+ cell number. Results representative of  $n = 3$  HemSC populations (2 implants each). Error bars represent  $\pm$  S.D. n.s., not significant,  $**p < 0.01$ . Student T-Test.  $\alpha$ SMA, alpha smooth muscle actin; GLUT1, glucose transporter 1; HemSC, hemangioma stem cell; MC, mural cell.

## Supplemental Figure 10, Edwards et al.

**A**

Human NOTCH3 decoy

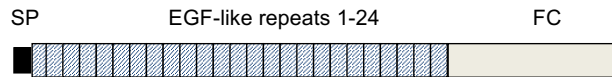

**B**

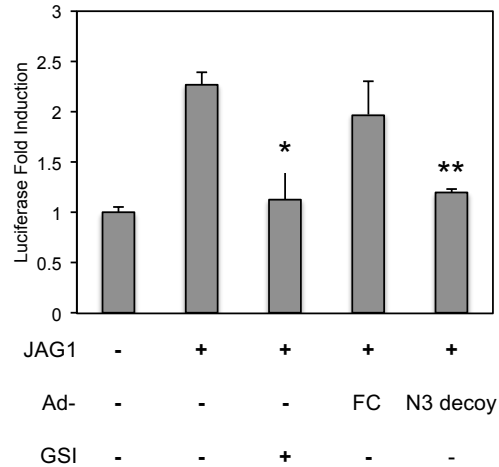

**Supplemental Figure 10. The NOTCH3 inhibitor, human NOTCH3 Decoy (N3 Decoy), inhibits JAG1 activation of Notch signaling. A)** N3 Decoy encodes the signal peptide (SP) and EGF-like repeats 1-24 of human NOTCH3 fused to in frame with human IgG FC. **B)** Notch/CSL signal activation measured in HeLa cells expressing full-length rat NOTCH1, N3 Decoy and a Notch luciferase reporter (11CSL-Luc) co-cultured with HeLa cells expressing the Notch ligand, JAG1. Addition of Compound E, a gamma-secretase inhibitor (GSI), was used as a control and inhibited Notch activation of the 11CSL-Luc reporter. Co-culture assays were performed in triplicate and repeated three times. Data presented as mean luciferase fold induction  $\pm$  S.D. \* $p < 0.02$ , \*\* $p < 0.005$ , Student T-Test. CSL, C promoter binding factor 1/Suppressor of Hairless/Lag-1.

## Supplemental Figure 11, Edwards et al.

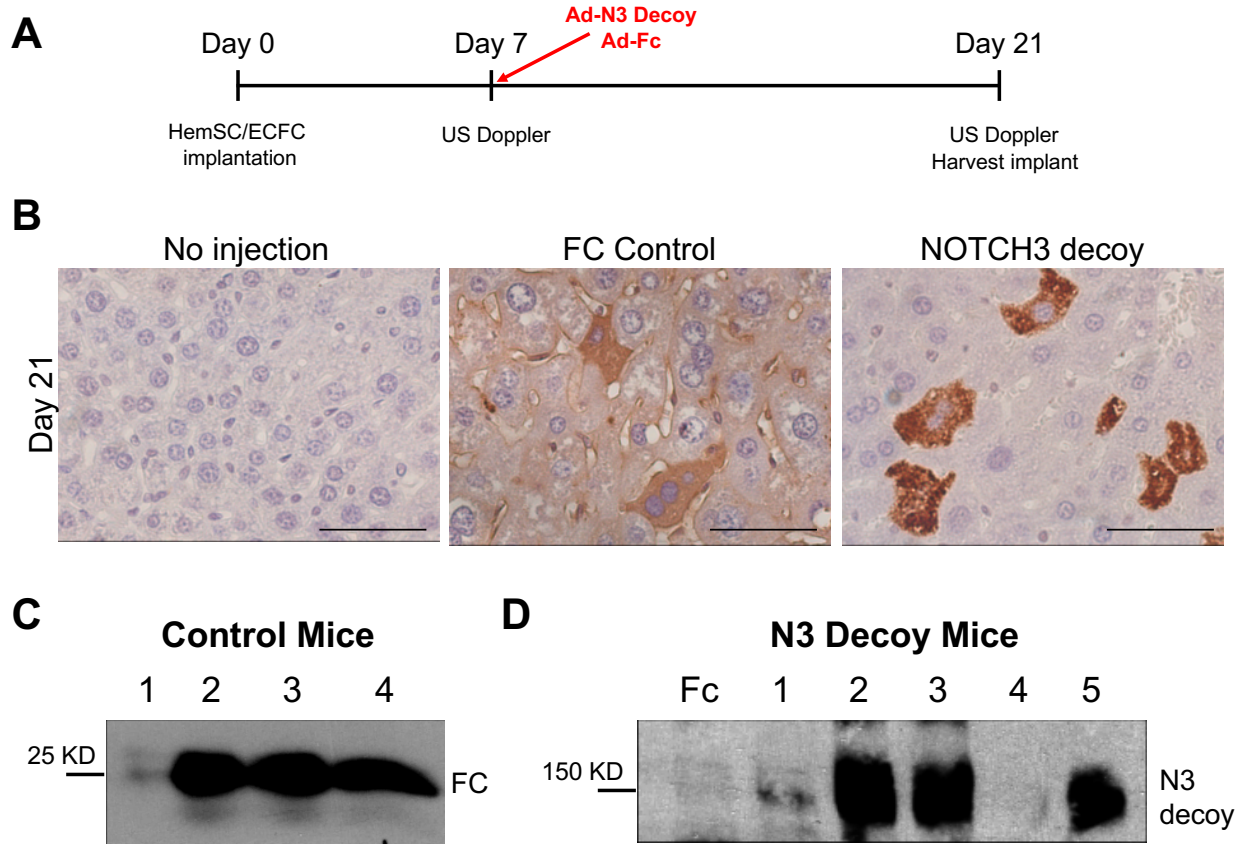

**Supplemental Figure 11. Design and validation of the NOTCH3 Decoy HemSC/ECFC xenograft study.** **A)** Schematic of experimental time-line. **B)** Staining with antibodies against human FC of livers (Day 21) from mice injected an adenovirus encoding either N3 Decoy or FC. Liver sections from un-injected mice served as a negative control. Scale bar - 50 $\mu$ m. **C)** Western blot with anti-FC antibody of sera (Day 21) collected from mice injected with the adenovirus encoding FC (n=4). **D)** Western blot of sera immunoprecipitated with antibodies against human FC and then probed with anti-FC antibody (n=5). N3 Decoy was not detected in the sera of mouse 4 and analysis of this xenograft was excluded from the study. ECFC, endothelial colony forming cell; HemSC, hemangioma stem cell; N3 Decoy; NOTCH3 Decoy

Supplemental Figure 12, Edwards et al.

**A**

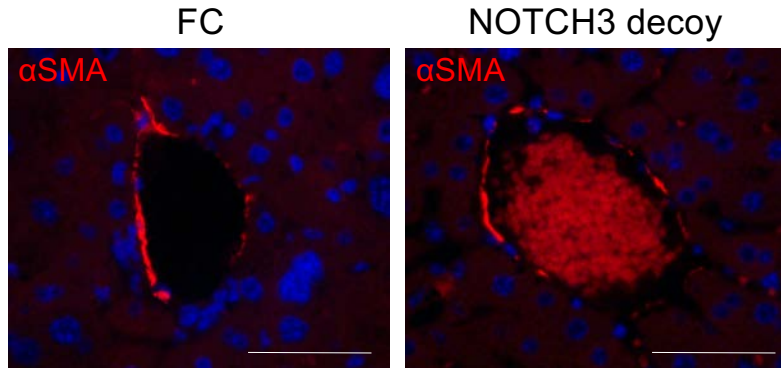

**B**

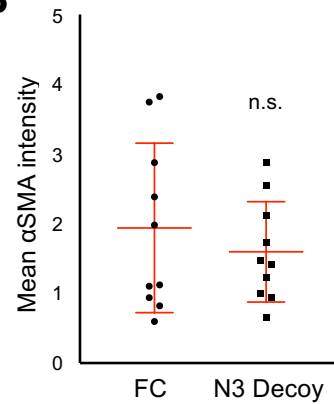

**Supplemental Figure 12. NOTCH3 Decoy treatment has no effects on  $\alpha$ SMA+ perivascular expression in hepatic vasculature.** **A)** Liver sections from mice treated with FC (control) or NOTCH3 Decoy (n=2 populations; n=4 xenografts each) stained for  $\alpha$ SMA. **B)** Mean  $\alpha$ SMA expression determined as mean  $\alpha$ SMA signal intensity normalized DAPI+/ $\alpha$ SMA+ cell number. (n=2 populations; n=4 xenografts each) n.s., not significant. Student T-Test.  $\alpha$ SMA, alpha smooth muscle actin.
